***miR-9a* regulates levels of both *rhomboid* mRNA and protein in the early *Drosophila melanogaster* embryo**

Lorenzo Gallicchio<sup>1,2</sup>, Sam Griffiths-Jones<sup>1</sup>, Matthew Ronshaugen<sup>3,\*</sup>

1 School of Biological Sciences, Faculty of Medicine, Biology and Health, Michael Smith Building, The University of Manchester

2 Current address: Beckman Centre for Molecular and Genetic Medicine, Department of Developmental Biology, Stanford University

3 School of Medical Sciences, Faculty of Medicine, Biology and Health, Michael Smith Building, The University of Manchester

\*Corresponding author

Email: [matthew.ronshaugen@manchester.ac.uk](mailto:matthew.ronshaugen@manchester.ac.uk)

Phone: +44 0161 275 3865

Address: Faculty of Biology, Medicine and Health, Michael Smith Building, Oxford Road,  
Manchester, M13 9PT, United Kingdom

**Running Title:** *miR-9a regulates rhomboid expression*

**Keywords:** *miR-9a*, *rhomboid*, Embryogenesis, single-cell quantification, smFISH

## 1 Abstract

2           MicroRNAs have subtle and combinatorial effects on the expression levels of their  
3 targets. Studying the consequences of a single microRNA knockout often proves difficult as  
4 many such knockouts exhibit phenotypes only under stress conditions. This has led to the  
5 hypothesis that microRNAs frequently act as buffers of noise in gene expression. Observing  
6 and understanding buffering effects requires quantitative analysis of microRNA and target  
7 expression in single cells. To this end, we have employed single molecule fluorescence *in situ*  
8 hybridization, immunofluorescence, and high-resolution confocal microscopy to investigate  
9 the effects of *miR-9a* loss on the expression of the serine-protease rhomboid in *Drosophila*  
10 *melanogaster* early embryos. Our single-cell quantitative approach shows that *rhomboid*  
11 mRNA exhibits the same spatial expression pattern in WT and *miR-9a* knockout embryos,  
12 although the number of mRNA molecules per cell is higher when *miR-9a* is absent. However,  
13 the level of rhomboid protein shows a much more dramatic increase in the *miR-9a* knockout.  
14 Specifically, we see accumulation of rhomboid protein in *miR-9a* mutants by stage 5, much  
15 earlier than in WT. The data therefore show that *miR-9a* functions in the regulation of  
16 *rhomboid* activity by both inducing mRNA degradation and inhibiting translation in the  
17 blastoderm embryo. Temporal regulation of neural proliferation and differentiation in  
18 vertebrates by *miR-9* is well-established. We suggest that *miR-9* family microRNAs are  
19 conserved regulators of timing in neurogenic processes. This work shows the power of single-  
20 cell quantification as an experimental tool to study phenotypic consequences of microRNA  
21 mis-regulation.

## 22 Introduction

23           The study of development in *Drosophila melanogaster* embryos, larvae, and adults has  
24 provided an extremely important model for the study of microRNA (miRNA) biogenesis and  
25 function (Matranga *et al.* 2005; Rand *et al.* 2005; Okamura *et al.* 2007). MicroRNAs are short  
26 ~22 nucleotide long, single-stranded, endogenous RNAs found in animals and plants (Bartel  
27 2004; Kozomara *et al.* 2019). MicroRNAs regulate gene expression post-transcriptionally by  
28 recruiting the RNA-induced silencing complex (RISC) and then binding to specific sequences  
29 on target mRNA molecules, usually in their 3'UTR. The binding of the miRNA-RISC triggers  
30 repression of translation, deadenylation, and/or degradation of the target mRNA (Valencia-  
31 Sanchez *et al.* 2006). It is estimated that the majority of animal mRNAs are targeted by  
32 miRNAs (Friedman *et al.* 2009; Agarwal *et al.* 2015). An intriguing debate has arisen regarding  
33 the phenotypic consequences of miRNA mis-regulation, with GOF (gain of function) and LOF  
34 (loss of function) studies in different organisms finding that they act as either minor  
35 modulators or key regulators of gene expression (Miska *et al.* 2007; Alvarez-Saavedra and  
36 Horvitz 2010; Chen *et al.* 2014).

37           In many cases, individual effects of miRNAs on the expression of a target are relatively  
38 small (Miska *et al.* 2007; Alvarez-Saavedra and Horvitz 2010; Chen *et al.* 2019a). In addition,  
39 each miRNA may target hundreds of different transcripts, and many different miRNAs have  
40 been found to act on the same targets (Peter 2010). It is therefore expected that a high degree  
41 of quantitative precision is required to determine specific effects of miRNAs on gene  
42 expression. Indeed, a complete understanding of miRNA function will only come from a  
43 precise quantitative analysis of miRNA activity at the single cell level. Single cell studies of  
44 miRNA effects on gene regulation may provide insight into mis-regulation phenotypes that

45 are not apparent at a tissue or organism level (Miska *et al.* 2007; Alvarez-Saavedra and Horvitz  
46 2010). It has also been observed that the phenotypic effects of miRNA mutation or mis-  
47 regulation are sometimes only revealed under particular conditions (e.g. dietary or  
48 temperature stresses) (Li *et al.* 2009; Kennell *et al.* 2012). For example, flies lacking *miR-14*  
49 are more sensible to salt stress compared to WT, while flies lacking *miR-7* present abnormal  
50 expression of the proteins Yan and Ato only under temperature fluctuations (Xu *et al.* 2003;  
51 Li *et al.* 2009). Such stress-dependent miRNA phenotypes have also been observed in other  
52 organisms such as mouse and zebrafish (Van Rooij *et al.* 2007; Flynt *et al.* 2009). Thus, the  
53 phenotypic consequences of miRNA mis-regulation may be subtle and cryptic.

54         The *mir-9* miRNA family is highly conserved in bilaterians and is a good example of a  
55 miRNA that can exhibit both subtle and strong phenotypes (Coolen *et al.* 2013). Experiments  
56 in a variety of vertebrate models show conservation of *mir-9* expression and function in  
57 neurogenesis and neuronal progenitor proliferation. Over-expression of *mir-9* in zebrafish  
58 embryos (Leucht *et al.* 2008), mouse embryonic cortex (Zhao *et al.* 2009) and chicken spinal  
59 cord (Otaegi *et al.* 2011) leads to a reduction of the number of proliferating progenitors,  
60 similarly to the observed effects in *Drosophila* (Li *et al.* 2006). Also common to these studies  
61 is the observation that *mir-9* alteration (both loss and gain of function) results in a quite mild  
62 phenotype (Shibata *et al.* 2011). This supports the idea that *mir-9* is not a biological switch  
63 that allows the cell to adopt a certain fate, but a control factor to maintain a proper  
64 development trajectory, possibly acting as a key component of a feedback control system.  
65 *mir-9* dysfunction has been associated with a number of human pathologies, including various  
66 kinds of cancer and neurodegenerative disorders (Coolen *et al.* 2013; He *et al.* 2017; Chen *et*  
67 *al.* 2019b; Khafaei *et al.* 2019). In medulloblastomas (a paediatric brain cancer) tumour cells  
68 appear to have a decreased expression of *mir-9*, while in a subclass of glioblastoma (an

69 aggressive adult brain cancer) tumour cells express *mir-9* at a higher level (Ferretti *et al.* 2009;  
70 Kim *et al.* 2011). *mir-9* has been found to have a role also in cancers not directly related with  
71 the nervous system, in which it may act as an oncogene or a tumour suppressor (Coolen *et al.*  
72 2013). These dual roles and opposite effects, combined with observations of subtle and  
73 cryptic phenotypes, has led to a model where miRNAs act to control or modulate the  
74 dynamics of biological processes, and not as biological switches themselves.

75 Many studies have focused on *miR-9a* as a modulator of the specification and number  
76 of *Drosophila* sensory organ precursor (SOP) cells, a key neuronal cell type that emerges  
77 during embryonic stage 10 (Li *et al.* 2006; Cassidy *et al.* 2013). At embryonic stage 5, *miR-9a*  
78 is expressed in the dorsal ectoderm and in the neuroectoderm: the germ layer in which the  
79 future neuronal precursor cells will form (Fu *et al.* 2014; Gallicchio *et al.* 2021). It is possible  
80 that *miR-9a* functions as a modulator of the genes required for proper ectoderm and  
81 neuroectoderm specification. This early expression is reminiscent of *miR-1*, a miRNA involved  
82 in mesoderm specification and muscle development, which is also expressed during early  
83 embryogenesis exclusively in the presumptive mesoderm (Sokol and Ambros 2005).  
84 Moreover, it has been suggested that both miRNAs might respond to the dorsal TF gradient  
85 that activates and inhibits expression of genes involved in establishing germ layers (Biemar *et*  
86 *al.* 2006). It is reported that *miR-9a* KO flies show defects on the wing margin (Li *et al.* 2006)  
87 and an homozygous KO for *miR-1* causes lethality in second instar larvae, which die  
88 immobilized and with abnormal musculature (Sokol and Ambros 2005). Nevertheless, no  
89 differences in germ layer specification during embryogenesis have ever been observed in  
90 either *miR-9a* or *miR-1* mutant (Fu *et al.* 2014). This is perhaps not surprising, as multiple  
91 miRNAs often function redundantly, and it is rare that a specific biological process is strongly  
92 affected when a single miRNA is knocked out (Liufu *et al.* 2017). However, when *miR-1* and

93 *miR-9a* are mutated together dramatic effects on embryonic development are observed (Fu  
94 *et al.* 2014). The double knockout displayed an ectopic overexpression of *rhomboid* (*rho*), a  
95 dorsal target gene expressed in the neuroectoderm, and a failure of gastrulation (Fu *et al.*  
96 2014). *rho* possesses two *miR-9a* binding sites on its 3'UTR, indicating that *miR-9a* might  
97 directly regulate *rho* mRNA degradation and/or translation.

98         We were therefore motivated to study *rho* expression in single cells and compare  
99 quantification of mRNA number and protein levels between WT and *miR-9a* KO embryos in  
100 the establishment of the embryonic domain of *rho* mRNA and protein. Using high resolution  
101 confocal microscopy coupled with multiplex smFISH and IF we examined expression domains,  
102 transcription dynamics and protein accumulation at the single cell level in whole mount  
103 developing *D. melanogaster* embryos. In *miR-9a* KO mutants, we observed an increase in both  
104 *rho* mRNA number per cell and Rho protein expression. We therefore conclude that *rho* is  
105 directly targeted by *miR-9a*. Together, these results show that single-cell analysis and  
106 quantification is a powerful approach to study miRNA function on target gene expression.

## 107 **Materials and Methods**

### 108 **Fly stocks, embryo collection, and fixing and larval dissection**

109 Flies were grown at 25 or 18°C. Embryos were collected after ~20 h and fixed in 1 V  
110 heptane + 1 V 4% formaldehyde for 30 min shaking at 220 rpm. The embryos were then  
111 washed and shaken vigorously for one minute in 100% methanol. Fixed embryos were stored  
112 in methanol at -20°C. Larvae were dissected in 1× PBS, carcasses were fixed in 1 V 1× PBS +  
113 1 V 10% formaldehyde for ~1 h, washed with methanol, and stored in methanol at -20°C.  
114 Genotypes used for this study are: W [1118], (from Bloomington Drosophila Resource Centre)  
115 and *mir-9a*<sup>E39</sup> mutants (Li *et al.* 2006) generously gifted by the Fen-Biao Gao lab.

116

### 117 **Probe design, smFISH, and Immunofluorescence**

118 We applied an inexpensive version (Tsanov *et al.* 2016; Morales-Polanco *et al.* 2021)  
119 of the conventional smFISH protocol in *Drosophila* (Trcek *et al.* 2017). Primary probes were  
120 designed against the mature *rho* mRNA (*rhomboid\_e*), the first *rho* intron (*rhomboid\_i*) and a  
121 genomic region flanking the *mir-9a* gene locus using the Biosearch Technologies Stellaris  
122 probe Designer (version 4.2). All sequences were obtained from FlyBase. To the 5' end of each  
123 probe was added the Flap sequence CCTCCTAAGTTTCGAGCTGGACTCAGTG. Multiple  
124 secondary probes that are complementary to the Flap sequence were tagged with  
125 fluorophores (CAL Fluor Orange 560, CAL Fluor Red 610, Quasar 670) to allow multiplexing.  
126 Probes sequences are reported in Supplementary Data. For Immunofluorescence we used the  
127 following antibodies: mouse anti-Dorsal (Developmental Studies Hybridoma Bank  
128 #AB\_528204) at 1:100, mouse anti-Spectrin (Developmental Studies Hybridoma Bank  
129 #AB\_520473) at 1:100, guinea-pig anti-Rho gently gifted from the Hayashi lab at 1:400 (Ogura



130 *et al.* 2018), goat anti-guinea pig IgG (H + L) Highly Cross-Adsorbed Secondary Antibody Alexa  
131 Fluor 555 (Invitrogen #A21435) at 1:500, and goat anti-mouse IgG (H + L) Highly Cross-  
132 Adsorbed Secondary Antibody Alexa Fluor 488 (Invitrogen #A32723) at 1:500. Further details  
133 on reagents used are provided in the Reagents Table.

134

### 135 **Imaging and quantification**

136 Imaging was performed using a Leica SP8 Inverted Tandem Head confocal microscope  
137 with LAS X v.3.5.1.18803 software (University of Manchester Bioimaging facility), using 40×,  
138 and 100× magnifications. Deconvolution was performed using Huygens Pro v16.05 software.  
139 Membrane segmentation was performed on Imaris (version 9.5.0), mRNA molecules and  
140 Transcription sites were counted after membrane segmentation on Imaris 9.5.0 using the Cell  
141 module. Protein fluorescence levels were measured using FIJI for Macintosh. From each  
142 picture, five measurements of background mean intensity were taken. Each single  
143 measurement was then adjusted using the formula: integrated density – (area × background  
144 mean).

145

### 146 **Data availability statement**

147 Strains and plasmids are available upon request. The authors affirm that all data  
148 necessary for confirming the conclusions of the article are present within the article, figures,  
149 and tables.

## 150 Results

### 151 *rho* and *mir-9a* are co-expressed in the neurogenic ectoderm.

152 After the identification of Rhomboid (Rho) as an intramembrane serine protease in  
153 *Drosophila*, Rho-like proteins have been identified in nearly every metazoan, suggesting a  
154 conserved role for the family (Urban *et al.* 2001; Freeman 2014). Although the molecular and  
155 cellular function of Rho-like proteins is well established, how their expression is post-  
156 transcriptionally regulated has not been examined in detail. We therefore decided to  
157 investigate if *miR-9a* and/or *miR-1* could directly regulate *rho* mRNA degradation and/or  
158 translation. As *miR-1* is exclusively expressed in the mesoderm (Sokol and Ambros 2005; Fu  
159 *et al.* 2014) and *miR-9a* in the dorsal and neurogenic ectoderm (Fu *et al.* 2014; Gallicchio *et*  
160 *al.* 2021) largely overlapping *rho* (Ip *et al.* 1992a), we hypothesize that *miR-9a* might directly  
161 target *rho*. We used TargetScan (Agarwal *et al.* 2018) and SeedVicious (Marco 2018) to  
162 computationally verify the presence of two potential *miR-9a* binding sites in the *D.*  
163 *melanogaster rho* 3'UTR. *rho* has 2 alternatively polyadenylated transcripts (based on the  
164 most recent gene annotation in FlyBase), and the predicted *miR-9a* binding sites are both  
165 located in the common 3'UTR region. In addition, we used SeedVicious to verify the presence  
166 of *miR-9a* binding sites on Rho orthologs in beetle (*Tribolium castaneum*), worm  
167 (*Caenorhabditis elegans*), zebrafish (*Danio rerio*), mouse (*Mus musculus*) and human, and the  
168 non-model organisms mosquito (*Anopheles gambiae*), butterfly (*Heliconius melpomene*) and  
169 mite (*Tetranychus urticae*) (Table 1).

170 We also employed nascent transcript smFISH to precisely establish the overlap in  
171 expression domains of *rho* and the primary transcript of *miR-9a* (*pri-mir-9a*). To identify cells  
172 that are actively transcribing *rho*, we designed probes against the first intron of *rho* to detect

173 active transcription sites (TS). As mature miRNAs are too short to be detected via smFISH, we  
174 designed probes against ~1kb of sequence flanking the *mir-9a* hairpin to detect the larger  
175 primary transcript. Using multiplex smiFISH, we were able to identify cells that are  
176 transcribing both *rho* and *mir-9a* at the same time (Figure 1). As expected, *rho* expressing cells  
177 are contained entirely within the *mir-9a* expression domain (Figure 1 A-B). Since it has been  
178 widely observed that gene expression patterns are highly dynamic during stage 5 (Reeves *et*  
179 *al.* 2012), we measured membrane introgression to distinguish between stage 5 sub-stages.  
180 We find that both *rho* and *mir-9a* expression pattern become more defined at the ventral  
181 edge of their expression domain as stage 5 proceeds (Figure 1 C-F). Interestingly, while *rho*  
182 expressing cells are generally also expressing *mir-9a*, there are many cells at the ventral edge  
183 that are expressing only *mir-9a* (Figure 1 C). As stage 5 progresses the two genes become co-  
184 expressed in the same cells, which mark a clear boundary between neurogenic ectoderm and  
185 presumptive mesoderm (Figure 1 D). It is therefore possible that the two genes respond  
186 differently to the Dorsal gradient, specifically to the repressor *snail*, which has been shown to  
187 repress both *mir-9a* and *rho* in the mesoderm (Hemavathy *et al.* 2004; Fu *et al.* 2014). Taken  
188 together, the co-expression of *rho* and *mir-9a* and presence of conserved *miR-9a* target sites  
189 suggest that *miR-9a* is a strong candidate to target *rho* mRNA during embryogenesis, and that  
190 this role may be evolutionally conserved.

191

### 192 **Increased *rhomboid* mRNA copy number in *miR-9a*<sup>E39</sup> mutants**

193 Combining high resolution confocal microscopy with smFISH, immunofluorescence  
194 and segmentation allows us to count mRNA molecules in individual cells in *Drosophila* early  
195 embryos. We quantified *rho* mRNA molecules per cell in WT and *mir-9a*<sup>E39</sup> stage 5 embryos  
196 (Figure 2 A-B). In order to tightly control the stage of embryonic development, we focused

197 only on stage 5 embryos that have a similar level of membrane introgression. As reported in  
198 Fu et al. (2014) the *rho* expression pattern is not spatially or temporally different in *miR-9a*<sup>E39</sup>  
199 mutant embryos. We imaged and quantified six embryos per genotype and inspected many  
200 more and we never saw an abnormal *rho* expression pattern. Nevertheless, when we  
201 performed single cell segmentation and quantification, differences started to emerge (see  
202 Figure 2 E and F). The data show that the 2 embryos have a spatially equivalent *rho* expression  
203 pattern, but the mRNA number per cell is higher in *miR-9a*<sup>E39</sup> mutant embryos. To corroborate  
204 this observation, we performed two independent smFISH experiments using different  
205 fluorophores (Figure 2, G-H), with 3 embryos per genotype. The number of cells that have low  
206 or no detected *rho* expression varies from embryo to embryo, likely due to stochastic leaky  
207 transcription or false positive detection and counting. After excluding cells with fewer than  
208 10 counted *rho* mRNAs, we found that in both experiments, *miR-9a*<sup>E39</sup> mutants possess a  
209 higher number of *rho* mRNA per cell.

210 To further characterize the difference in *rho* mRNA number in single cells, we coupled  
211 the intronic probes used in Figure 1 against *rho* introns with the probes used in Figure 2  
212 against the mature *rho* transcripts, in order to simultaneously quantify *rho* TSs and mature  
213 mRNA molecules (Figure 3). We used 100X images to separate and quantify *rho* TS number  
214 per cell (maximum 2 per cell prior to replication and 4 per cell following). As the higher  
215 magnification does not permit imaging of entire embryos, we focused on the central region  
216 of the *rho* expressing stripe, again in stage 5 embryos with a similar membrane introgression  
217 (Figure 3 A-B-C, A'-B'-C'). The comparison of *rho* mRNA distribution between WT and *miR-*  
218 *9a*<sup>E39</sup> embryos again shows that *miR-9a*<sup>E39</sup> embryos have higher levels of *rho* mRNA number  
219 per cell (Figure 3 E). The detection and quantification of *rho* TSs allowed us to distinguish  
220 between cells that are differentially transcribing *rho*, and thus subgroup them in 3 classes:

221 cells with no TSs, cells with one TS and cells with two (or more) TSs. In Figure 3-F we reported  
222 that cells with a higher number of TSs also show an increased number of *rho* mRNAs, and for  
223 each group of cells *miR-9a*<sup>E39</sup> have a generally higher number of transcripts with respect to  
224 WT embryos. This becomes particularly evident for cells that are not transcribing *rho* at the  
225 moment the embryo was fixed. It is important to note that very few cells have 3 or 4 TSs (<10  
226 per image over ~700 segmented cells). These may represent cells following DNA replication,  
227 or errors in the segmentation process. We are confident that these small numbers do not  
228 significantly affect our analysis.

229

### 230 ***miR-9a* does not affect cell-to-cell variation in *rhomboid* mRNA number**

231 MicroRNAs are generally thought to have subtle effects on gene expression, mostly  
232 acting as buffering factors against intrinsic and extrinsic noise. We therefore investigated  
233 whether *miR-9a* might not only affect the number of *rho* transcripts per cell, but also cell-to-  
234 cell variability in the number of mature mRNAs present. In order to quantify these effects, we  
235 identified the immediate cell neighbours of each segmented cell, and then calculated how  
236 variable the *rho* mRNA number per cell is amongst the identified neighbours. As variance  
237 scales with mean, areas with high variance do not necessarily correspond to areas in which  
238 the cell-to-cell variability is intrinsically higher. Other statistical parameters that have been  
239 widely used in order to describe cell-to-cell variability are the coefficient of variation (CV) and  
240 the Fano factor (FF) (Munsky *et al.* 2012; Foreman and Wollman 2020). FF is defined as  
241 variance/mean while CV as standard deviation/mean. Thus, both measures are mean-  
242 normalized. CV is a unitless parameter, and has been used to compare cell-to-cell variability  
243 between mRNAs or protein levels resulting from the expression of different genes (Foreman  
244 and Wollman 2020). On the other hand, FF has a dimension, and has been used to measure

245 how the observed data are dispersed from a Poisson distribution, which has FF equal to 1  
246 (Thattai and Van Oudenaarden 2001; Hortsch and Kremling 2018). We therefore calculated  
247 the FFs for the *rho* mRNA and TS counts reported in Figure 2 and Figure 3 (see Figure 4). We  
248 observe that the FF is marginally higher in *miR-9a*<sup>E39</sup> mutants. Closer inspection shows that  
249 the FF is higher in *miR-9a*<sup>E39</sup> mutants only in the group of cells with no transcription sites,  
250 while groups of cells that have a single TS and 2 or more TSs have higher FF in the WT. We  
251 speculate that the *miR-9a* buffering action on *rho* mRNA number per cell becomes more  
252 evident and/or necessary in quiescent cells that are not actively transcribing *rho*.

253

#### 254 **Rho is over-expressed in *miR-9a*<sup>E39</sup> mutants during embryonic stage 5 and 6.**

255 As a change in mRNA levels does not necessarily linearly correlate with the change in  
256 accumulation of the encoded protein (Koussounadis *et al.* 2015), we compared Rho protein  
257 levels between WT and *miR-9a*<sup>E39</sup> embryos. It has been reported that Rho protein expression  
258 is detectable from the embryonic stages 10-11 in WT animals, despite *rho* mRNA being  
259 transcribed much earlier during stage 5 (Llimargas and Casanova 1999). However, we find  
260 that during stage 5, Rho protein was detectable in *miR-9a*<sup>E39</sup> embryos. In Figure 5 we show  
261 Rho staining in stage 5 and stage 6 WT and *miR-9a*<sup>E39</sup> embryos with relative quantifications.  
262 Anti-Dorsal antibody was used to provide a further control on the quality of the staining and  
263 to orient the embryos. Fluorescence measurements were performed in FIJI by randomly  
264 selecting 15 areas per embryo (5 in the anterior, 5 in the central and 5 in the posterior  
265 regions). Quantifications shown in Figure 5 (panels C and F for stage 5 and 6 respectively)  
266 clearly show that Rho levels are significantly higher (p-value < 0.0001 in both cases) in *miR-*  
267 *9a*<sup>E39</sup> mutants.

## 268 Discussion

269 *rho* has been one of the most studied Dorsal target genes. Its expression becomes  
270 restricted to the neurogenic ectoderm in a precisely orchestrated manner: the low nuclear  
271 levels of Dorsal in the dorsal ectoderm do not support *rho* activation, while *snail* represses its  
272 transcription in the mesoderm (Ip *et al.* 1992b; Hong *et al.* 2008). *rho* has not been previously  
273 studied as a direct target of miRNA regulation, but the combined effect of mutations in *miR-*  
274 *1* and *miR-9a* on *rho* mRNA distribution motivated our investigation into *rho* regulation by  
275 miRNAs (Fu *et al.* 2014). We found that the per cell copy number of *rho* mRNA is significantly  
276 higher in *miR-9a*<sup>E39</sup> mutant embryos (Figure 2 and Figure 3), suggesting *miR-9a* affects *rho*  
277 mRNA stability or degradation. We could not find a clear effect of *miR-9a* on cell-to-cell  
278 variability of the number of either *rho* mRNA transcription sites or mRNA molecules (Figure  
279 4). Nevertheless, when we distinguish between cells that are and are not actively transcribing  
280 *rho*, we find that the FF of cells with no transcription sites was significantly higher in *miR-9a*<sup>E39</sup>  
281 mutants. This leads us to suggest that, in WT animals, *rho* mRNA is “rapidly” degraded when  
282 transcription stops, whereas this degradation is less efficient when *miR-9a* is removed, and  
283 cell heterogeneity consequently increases. To our knowledge, this is the first study in which  
284 mRNA copy number was compared in different genotypes using single cell quantitative  
285 microscopy in order to uncover miRNA regulatory roles on target gene expression.

286 It has been shown that protein levels are usually more stable than mRNA levels (Perl  
287 *et al.* 2017). The *miR-9a* regulatory effect on Rho protein accumulation might therefore be  
288 more evident than the one we observed on the mRNA as it better reflects the integrated  
289 activity over time. Rho is a transmembrane protease localized in the Golgi. While Fu *et al.*  
290 reported *rho* mRNA patterns in double *miR-9a/miR-1* mutants (Fu *et al.* 2014), no information

291 on the protein pattern was previously available. We observed dramatic differences in timing  
292 and level of Rho protein accumulation when comparing WT and *miR-9a*<sup>E39</sup> embryos. In the  
293 WT, Rho was only detectable from stage ~10, whereas in *miR-9a*<sup>E39</sup> embryos it was clearly  
294 present from stage 5, the same stage when we see *rho* transcription initiate. The early  
295 accumulation of Rho protein appears to be inhibited by *miR-9a*. We suggest that translational  
296 inhibition by *miR-9a* is released when a certain level of *rho* mRNA is reached, or in response  
297 to an external signal later in development. We also note the possibility that early low levels  
298 of Rho protein accumulation may be present but are undetectable with current technology.

299       Previous work on the *miR-9a/miR-1* double mutant shows that when *miR-1* is also  
300 removed, greater developmental defects emerge leading to failure of gastrulation and ventral  
301 midline enclosure (Fu *et al.* 2014). This phenotype suggests that these two miRNAs play an  
302 important role in germ layer differentiation. Indeed, while *miR-9a* and *miR-1* involvement in  
303 dorso-ventral (DV) axis patterning has not been definitively established, their expression  
304 patterns indicate they are targets of DV specification (Biemar *et al.* 2006). Our current findings  
305 provide convincing evidence for a role of *miR-9a* in the DV patterning process during early  
306 *Drosophila* embryogenesis. We posit that *miR-9a* regulates *rho* mRNA accumulation and  
307 translation, possibly affecting Epidermal Growth Factor Receptor (EGFR) signalling and  
308 specification of the dorsal and neurogenic ectoderm (Golembo *et al.* 1996; Guichard *et al.*  
309 1999). The role of *miR-1* is less clear as *miR-1* is not expressed in the same region as *rho*, and  
310 therefore *miR-1* can affect *rho* expression only indirectly. *miR-1* is involved in muscle  
311 development and is exclusively expressed in the mesoderm (Sokol and Ambros 2005). We  
312 suggest that the combination of disrupted *miR-1* function in the mesoderm and *miR-9a*  
313 function in the neurogenic ectoderm leads to disruption in establishment or maintenance of



314 an organized border between these two germ layers, as seen in the double mutants (Fu *et al.*  
315 2014).

316 To conclude, we have shown in this work a new role of a the well conserved *miR-9a*  
317 during early *Drosophila* embryogenesis. We have observed that *miR-9a* affects both *rho*  
318 mRNA copy number per cell (possibly by degradation) and inhibits *rho* translation. Our  
319 findings also show the importance of single-cell quantification when studying the effects of  
320 miRNA regulation on target genes. As miRNAs act as weak modulators of gene expression,  
321 single-cell quantitative approaches can reveal previously unknown effects on mRNA and  
322 protein regulation by miRNAs. This work and the methods described can be easily applied to  
323 many other miRNA-target gene networks to allow new insights into miRNA function during  
324 development.

## 325 **Acknowledgments**

326           We thank the staff from the University of Manchester' Bioimaging Facility, in particular  
327 Dr. Peter March, for help with confocal microscopy. We also thank the Hayashi lab for  
328 providing anti-Rho antibodies, the Fen-Biao Gao lab for providing *miR-9a*<sup>E39</sup> flies and Dr.  
329 Fabian Morales-Polanco for discussions and comments on the manuscript.

330

## 331 **Funding**

332           This work was funded by a Wellcome Trust funded 4-years PhD studentship  
333 [203808/Z/16/Z] to LG.

334

## 335 **Competing interests**

336           The authors declare no competing interests.

337

## 338 **Author contributions**

339           LG, MR and SGJ conceived the project. Experiments were designed by LG and MR and  
340 performed by LG. The manuscript was written by all the authors.

341

## 342 **References**

- 343 Agarwal, V., G. W. Bell, J. W. Nam, and D. P. Bartel, 2015 Predicting effective microRNA target  
344 sites in mammalian mRNAs. *Elife* 4: e05005.
- 345 Agarwal, V., A. O. Subtelny, P. Thiru, I. Ulitsky, and D. P. Bartel, 2018 Predicting microRNA  
346 targeting efficacy in *Drosophila*. *Genome Biol.* 19: 152.
- 347 Alvarez-Saavedra, E., and H. R. Horvitz, 2010 Many Families of *C. elegans* MicroRNAs Are Not  
348 Essential for Development or Viability. *Curr. Biol.* 20: 367–373.
- 349 Bartel, D. P., 2004 MicroRNAs: Genomics, Biogenesis, Mechanism, and Function. *Cell* 116:  
350 281–297.
- 351 Biemar, F., D. A. Nix, J. Piel, B. Peterson, M. Ronshaugen *et al.*, 2006 Comprehensive  
352 identification of *Drosophila* dorsal-ventral patterning genes using a whole-genome tiling  
353 array. *Proc. Natl. Acad. Sci. U. S. A.* 103: 12763–12768.
- 354 Cassidy, J. J., A. R. Jha, D. M. Posadas, R. Giri, K. J. T. Venken *et al.*, 2013 MiR-9a minimizes the  
355 phenotypic impact of genomic diversity by buffering a transcription factor. *Cell* 155:  
356 1556–1567.
- 357 Chen, Y., Y. Shen, P. Lin, D. Tong, Y. Zhao *et al.*, 2019a Gene regulatory network stabilized by  
358 pervasive weak repressions: MicroRNA functions revealed by the May-Wigner theory.  
359 *Natl. Sci. Rev.* 6: 1176–1188.
- 360 Chen, Y. W., S. Song, R. Weng, P. Verma, J. M. Kugler *et al.*, 2014 Systematic study of  
361 *Drosophila* MicroRNA functions using a collection of targeted knockout mutations. *Dev.*  
362 *Cell* 31: 784–800.
- 363 Chen, X., F. Yang, T. Zhang, W. Wang, W. Xi *et al.*, 2019b MiR-9 promotes tumorigenesis and  
364 angiogenesis and is activated by MYC and OCT4 in human glioma. *J. Exp. Clin. Cancer Res.*

365 38: 99.

366 Coolen, M., S. Katz, and L. Bally-Cuif, 2013 miR-9: A versatile regulator of neurogenesis. *Front.*  
367 *Cell. Neurosci.* 7: 220.

368 Ferretti, E., E. De Smaele, A. Po, L. Di Marcotullio, E. Tosi *et al.*, 2009 MicroRNA profiling in  
369 human medulloblastoma. *Int. J. Cancer* 124: 568–577.

370 Flynt, A. S., E. J. Thatcher, K. Burkewitz, N. Li, Y. Liu *et al.*, 2009 miR-8 microRNAs regulate the  
371 response to osmotic stress in zebrafish embryos. *J. Cell Biol.* 185: 115–127.

372 Foreman, R., and R. Wollman, 2020 Mammalian gene expression variability is explained by  
373 underlying cell state. *Mol. Syst. Biol.* 16: e9146.

374 Freeman, M., 2014 The rhomboid-like superfamily: molecular mechanisms and biological  
375 roles. *Annu. Rev. Cell Dev. Biol.* 30: 235–254.

376 Friedman, R. C., K. K. H. Farh, C. B. Burge, and D. P. Bartel, 2009 Most mammalian mRNAs are  
377 conserved targets of microRNAs. *Genome Res.* 19: 92–105.

378 Fu, S., C. Y. Nien, H. L. Liang, and C. Rushlow, 2014 Co-activation of microRNAs by Zelda is  
379 essential for early drosophila development. *Dev.* 141: 2108–2118.

380 Gallicchio, L., S. Griffiths-Jones, and M. Ronshaugen, 2021 Single-cell visualization of miR-9a  
381 and Senseless co-expression during *Drosophila melanogaster* embryonic and larval  
382 peripheral nervous system development. *G3 Genes, Genomes, Genet.* 11: jkaa010.

383 Golembo, M., E. Raz, and B. Z. Shilo, 1996 The *Drosophila* embryonic midline is the site of  
384 Spitz processing, and induces activation of the EGF receptor in the ventral ectoderm.  
385 *Development* 122: 3363–3370.

386 Guichard, A., B. Biehs, M. A. Sturtevant, L. Wickline, J. Chacko *et al.*, 1999 Rhomboid and Star  
387 interact synergistically to promote EGFR/MAPK signaling during *Drosophila* wing vein  
388 development. *Development* 126: 2663–2676.

- 389 He, L., L. Zhang, M. Wang, and W. Wang, 2017 miR-9 functions as a tumor inhibitor of cell  
390 proliferation in epithelial ovarian cancer through targeting the SDF-1/CXCR4 pathway.  
391 *Exp. Ther. Med.* 13: 1203–1208.
- 392 Hemavathy, K., X. Hu, S. I. Ashraf, S. J. Small, and Y. T. Ip, 2004 The repressor function of Snail  
393 is required for *Drosophila* gastrulation and is not replaceable by Escargot or Worniu. *Dev.*  
394 *Biol.* 269: 411–420.
- 395 Hong, J. W., D. A. Hendrix, D. Papatsenko, and M. S. Levine, 2008 How the Dorsal gradient  
396 works: Insights from postgenome technologies. *Proc. Natl. Acad. Sci. U. S. A.* 105: 20072–  
397 20076.
- 398 Hortsch, S. K., and A. Kremling, 2018 Adjusting Noise in the Genetic Toggle Switch through  
399 Stochastic Circuit Design. *IFAC-PapersOnLine* 51: 68–71.
- 400 Ip, Y. T., R. E. Park, D. Kosman, E. Bier, and M. Levine, 1992a The dorsal gradient morphogen  
401 regulates stripes of rhomboid expression in the presumptive neuroectoderm of the  
402 *Drosophila* embryo. *Genes Dev.* 6: 1728–1739.
- 403 Ip, Y. T., R. E. Park, D. Kosman, K. Yazdanbakhsh, and M. Levine, 1992b dorsal-twist  
404 interactions establish snail expression in the presumptive mesoderm of the *Drosophila*  
405 embryo. *Genes Dev.* 6: 1518–1530.
- 406 Kennell, J. A., K. M. Cadigan, I. Shakhmantsir, and E. J. Waldron, 2012 The microRNA miR-8 is  
407 a positive regulator of pigmentation and eclosion in *Drosophila*. *Dev. Dyn.* 241: 161–168.
- 408 Khafaei, M., E. Rezaie, A. Mohammadi, P. Shahnazi Gerdehsang, S. Ghavidel *et al.*, 2019 miR-  
409 9: From function to therapeutic potential in cancer. *J. Cell. Physiol.* 234: 14651–14665.
- 410 Kim, T. M., W. Huang, R. Park, P. J. Park, and M. D. Johnson, 2011 A developmental taxonomy  
411 of glioblastoma defined and maintained by microRNAs. *Cancer Res.* 71: 3387–3399.
- 412 Koussounadis, A., S. P. Langdon, I. H. Um, D. J. Harrison, and V. A. Smith, 2015 Relationship

413 between differentially expressed mRNA and mRNA-protein correlations in a xenograft  
414 model system. *Sci. Rep.* 5: 1–13.

415 Kozomara, A., M. Birgaoanu, and S. Griffiths-Jones, 2019 MiRBase: From microRNA sequences  
416 to function. *Nucleic Acids Res.* 47: 155–162.

417 Leucht, C., C. Stigloher, A. Wizenmann, R. Klafke, A. Folchert *et al.*, 2008 MicroRNA-9 directs  
418 late organizer activity of the midbrain-hindbrain boundary. *Nat. Neurosci.* 11: 641–648.

419 Li, X., J. J. Cassidy, C. A. Reinke, S. Fischboeck, and R. W. Carthew, 2009 A MicroRNA Imparts  
420 Robustness against Environmental Fluctuation during Development. *Cell* 137: 273–282.

421 Li, Y., F. Wang, J. A. Lee, and F. B. Gao, 2006 MicroRNA-9a ensures the precise specification of  
422 sensory organ precursors in *Drosophila*. *Genes Dev.* 20: 2793–2805.

423 Liufu, Z., Y. Zhao, L. Guo, G. Miao, J. Xiao *et al.*, 2017 Redundant and incoherent regulations  
424 of multiple phenotypes suggest microRNAs' role in stability control. *Genome Res.* 27:  
425 1665–1673.

426 Llimargas, M., and J. Casanova, 1999 EGF signalling regulates cell invagination as well as cell  
427 migration during formation of tracheal system in *Drosophila*. *Dev. Genes Evol.* 209: 174–  
428 179.

429 Marco, A., 2018 SeedVicious: Analysis of microRNA target and near-target sites. *PLoS One* 13:  
430 e0195532.

431 Matranga, C., Y. Tomari, C. Shin, D. P. Bartel, and P. D. Zamore, 2005 Passenger-strand  
432 cleavage facilitates assembly of siRNA into Ago2-containing RNAi enzyme complexes.  
433 *Cell* 123: 607–620.

434 Miska, E. A., E. Alvarez-Saavedra, A. L. Abbott, N. C. Lau, A. B. Hellman *et al.*, 2007 Most  
435 *Caenorhabditis elegans* microRNAs are individually not essential for development or  
436 viability. *PLoS Genet.* 3: 2395–2403.

- 437 Morales-Polanco, F., C. Bates, J. Lui, J. Casson, C. A. Solari *et al.*, 2021 Core Fermentation  
438 (CoFe) granules focus coordinated glycolytic mRNA localization and translation to fuel  
439 glucose fermentation. *IScience* 24: 102069.
- 440 Munsky, B., G. Neuert, and A. Van Oudenaarden, 2012 Using gene expression noise to  
441 understand gene regulation. *Science* (80- ). 336: 183–187.
- 442 Ogura, Y., F. L. Wen, M. M. Sami, T. Shibata, and S. Hayashi, 2018 A Switch-like Activation  
443 Relay of EGFR-ERK Signaling Regulates a Wave of Cellular Contractility for Epithelial  
444 Invagination. *Dev. Cell* 46: 162-172.e5.
- 445 Okamura, K., J. W. Hagen, H. Duan, D. M. Tyler, and E. C. Lai, 2007 The Mirtron Pathway  
446 Generates microRNA-Class Regulatory RNAs in *Drosophila*. *Cell* 130: 89–100.
- 447 Otaegi, G., A. Pollock, J. Hong, and T. Sun, 2011 MicroRNA miR-9 modifies motor neuron  
448 columns by a tuning regulation of FoxP1 levels in developing spinal cords. *J. Neurosci.*  
449 31: 809–818.
- 450 Perl, K., K. Ushakov, Y. Pozniak, O. Yizhar-Barnea, Y. Bhonker *et al.*, 2017 Reduced changes in  
451 protein compared to mRNA levels across non-proliferating tissues. *BMC Genomics* 18:  
452 305.
- 453 Peter, M. E., 2010 Targeting of mRNAs by multiple miRNAs: The next step. *Oncogene* 29:  
454 2161–2164.
- 455 Rand, T. A., S. Petersen, F. Du, and X. Wang, 2005 Argonaute2 cleaves the anti-guide strand  
456 of siRNA during RISC activation. *Cell* 123: 621–629.
- 457 Reeves, G. T., N. Trisnadi, T. V. Truong, M. Nahmad, S. Katz *et al.*, 2012 Dorsal-Ventral Gene  
458 Expression in the *Drosophila* Embryo Reflects the Dynamics and Precision of the Dorsal  
459 Nuclear Gradient. *Dev. Cell* 22: 544–557.
- 460 Van Rooij, E., L. B. Sutherland, X. Qi, J. A. Richardson, J. Hill *et al.*, 2007 Control of stress-

461 dependent cardiac growth and gene expression by a microRNA. *Science* (80-. ). 316: 575–  
462 579.

463 Shibata, M., H. Nakao, H. Kiyonari, T. Abe, and S. Aizawa, 2011 MicroRNA-9 regulates  
464 neurogenesis in mouse telencephalon by targeting multiple transcription factors. *J.*  
465 *Neurosci.* 31: 3407–3422.

466 Sokol, N. S., and V. Ambros, 2005 Mesodermally expressed *Drosophila* microRNA-1 is  
467 regulated by Twist and is required in muscles during larval growth. *Genes Dev.* 19: 2343–  
468 2354.

469 Thattai, M., and A. Van Oudenaarden, 2001 Intrinsic noise in gene regulatory networks. *Proc.*  
470 *Natl. Acad. Sci. U. S. A.* 98: 8614–8619.

471 Trcek, T., T. Lionnet, H. Shroff, and R. Lehmann, 2017 mRNA quantification using single-  
472 molecule FISH in *Drosophila* embryos. *Nat. Protoc.* 12: 1326–1347.

473 Tsanov, N., A. Samacoits, R. Chouaib, A. M. Traboulsi, T. Gostan *et al.*, 2016 SmiFISH and FISH-  
474 quant - A flexible single RNA detection approach with super-resolution capability.  
475 *Nucleic Acids Res.* 44: e165.

476 Urban, S., J. R. Lee, and M. Freeman, 2001 *Drosophila* Rhomboid-1 defines a family of putative  
477 intramembrane serine proteases. *Cell* 107: 173–182.

478 Valencia-Sanchez, M. A., J. Liu, G. J. Hannon, and R. Parker, 2006 Control of translation and  
479 mRNA degradation by miRNAs and siRNAs. *Genes Dev.* 20: 515–524.

480 Xu, P., S. Y. Vernooy, M. Guo, and B. A. Hay, 2003 The *Drosophila* microRNA mir-14 suppresses  
481 cell death and is required for normal fat metabolism. *Curr. Biol.* 13: 790–795.

482 Zhao, C., G. Sun, S. Li, and Y. Shi, 2009 A feedback regulatory loop involving microRNA-9 and  
483 nuclear receptor TLX in neural stem cell fate determination. *Nat. Struct. Mol. Biol.* 16:  
484 365–371.



## 485 **Figure legends**

486

### 487 **Figure 1. *rhomboid* and *miR-9a* are co-expressed in the neurogenic ectoderm.**

488 (A) Early and (B) middle stage 5 *D. melanogaster* embryos stained with probes against  
489 *rhomboid* intron (yellow) and the primary transcript of *miR-9a* (magenta). (C-D) zooms of  
490 highlighted areas in A and B respectively. In green is highlighted the presumptive ventral  
491 midline, which separates mesoderm and ectoderm (pVM). (E-F) Brightfields of ventral borders  
492 of the embryos in A and B showing membrane introgression (M.i.). Scalebars: 100  $\mu\text{m}$  (A-B),  
493 25  $\mu\text{m}$  (C-D-E-F).

494

### 495 **Figure 2. *rhomboid* mRNA number per cell is higher in *miR-9a*<sup>E39</sup> embryos**

496 (A) WT and (B) *miR-9a*<sup>E39</sup> middle stage 5 embryos stained with a probe set against *Rhomboid*  
497 transcripts. (C-D) Brightfields of a ventral region from embryos in A and B respectively  
498 showing membrane introgression. (E-F) Computational reconstruction after segmentation of  
499 the embryos in A and B. The colormap is based on mRNA number per cell with grey being low,  
500 green intermediate and purple high. (G-H) Two independent quantifications of *rhomboid*  
501 mRNA number in single cells in WT and *miR-9a*<sup>E39</sup> mutant embryos. Each quantification was  
502 performed using 3 embryos per genotype. Both p-values <0.0001. Scalebars: 100  $\mu\text{m}$  (A-B),  
503 25  $\mu\text{m}$  (C-D).

504

### 505 **Figure 3. Detection and quantification of *rhomboid* transcription sites in single cells.**

506 Central region of (A) WT and (A') *miR-9a*<sup>E39</sup> embryos respectively. Orientation is indicated by  
507 the white arrow (Ant = Anterior embryonic region, Pos = Posterior embryonic region). (B-B')

508 Zoom from red area highlighted in A and A' respectively showing staining against *rhomboid*  
509 intron (*rhomboid\_i*, magenta), Spectrin to mark cellular membrane (yellow) and DAPI (grey).  
510 (C-C') Zoom from red area highlighted in A and A' respectively showing staining against  
511 *rhomboid* exon (*rhomboid\_e*, green), Spectrin and DAPI. (D-D') Computational  
512 reconstructions of the images in A and A' respectively. Each dot corresponds to a segmented  
513 cell. The size of the dot corresponds to the number of *rhomboid* mRNAs detected with  
514 *rhomboid\_e*, while the colour corresponds to the number of detected transcription sites with  
515 *rhomboid\_i*. (E) Comparison between WT and *miR-9a<sup>E39</sup>* *rhomboid* mRNA number per cell. p-  
516 value = 0.0014. (F) Quantified cells are grouped depending on how many alleles are actively  
517 transcribing the *rhomboid* locus: grey = 0 alleles active (p-value <0.0001), orange = 1 allele  
518 active (p-value = 0.0021), red = 2 or more alleles active (p-value = 0.0259). Scalebars: 100  $\mu$ m  
519 (A-A'), 25  $\mu$ m (B-C-B'-C').

520

521 **Figure 4. Fano factor quantification and comparison between WT and *miR-9a<sup>E39</sup>* mutant**  
522 **embryos.**

523 Computational reconstruction of Fano factor distribution calculated in neighbour clusters in  
524 (A) WT and (B) *miR-9a<sup>E39</sup>* stage 5 embryos. These two embryos are the same reported in figure  
525 2 E-F respectively. (C-D) Comparison between Fano factor in WT and *miR-9a<sup>E39</sup>* embryos in 2  
526 independent experiments (n = 3 embryos each). P-value < 0.0001 in both graphs. (E-G)  
527 Graphical reconstruction of Fano factor distribution calculated in neighbour cells clusters in a  
528 WT and *miR-9a<sup>E39</sup>* embryos, corresponding to Figure 3 A-A' respectively. (F) cells are sub-  
529 grouped depending on their transcription sites number. p-values = 0.0147 (0 TS) and 0.0123  
530 (1 TS), ns = non-significant.

531

532 **Figure 5. Rhomboid protein is over-expressed in *miR-9a*<sup>E39</sup> embryos during stage 5 and 6.**  
533 (A-B) Stage 5 WT and (A'-B') *miR-9a*<sup>E39</sup> embryos respectively stained against Dorsal (red) and  
534 Rhomboid (cyan). (C) Adjusted fluorescence levels from Rhomboid staining in stage 5 embryos  
535 (n=3 per genotype). In each embryo 15 areas equally distributed along the Dorsal expression  
536 border were quantified. Measurements are reported in Log10 scale. P-value < 0.0001. (D-E,  
537 D'-E') Stage 6 WT and *miR-9a*<sup>E39</sup> embryos respectively stained against Dorsal (red) and  
538 Rhomboid (cyan). (F) Adjusted fluorescence levels from Rhomboid staining in stage 6 embryos  
539 (n=3 per genotype). Quantified as in (C). P-value < 0.0001. Scalebars: 100  $\mu$ m in all panels.

## 540 Supplementary material

541 **Table S1.** Probes against *mir-9a*

| Probe # | Probe Sequence (5'→ 3')                         |
|---------|-------------------------------------------------|
| 1       | CCTCCTAAGTTTCGAGCTGGACTCAGTgttggtcaagtgactgtaac |
| 2       | CCTCCTAAGTTTCGAGCTGGACTCAGTccatcgattctcaatgttt  |
| 3       | CCTCCTAAGTTTCGAGCTGGACTCAGTccattcttactctactctta |
| 4       | CCTCCTAAGTTTCGAGCTGGACTCAGTttatgcccacaaaacgaga  |
| 5       | CCTCCTAAGTTTCGAGCTGGACTCAGTatatgcacgctacgacgatc |
| 6       | CCTCCTAAGTTTCGAGCTGGACTCAGTaagcgaggagctgcaatgat |
| 7       | CCTCCTAAGTTTCGAGCTGGACTCAGTgaaaactcgatgcatggga  |
| 8       | CCTCCTAAGTTTCGAGCTGGACTCAGTgttcgtccagaaccagaaac |
| 9       | CCTCCTAAGTTTCGAGCTGGACTCAGTaggtaaagttggacgagcg  |
| 10      | CCTCCTAAGTTTCGAGCTGGACTCAGTgcaacgagataatggtcgga |
| 11      | CCTCCTAAGTTTCGAGCTGGACTCAGTgtatgcattttgcatagact |
| 12      | CCTCCTAAGTTTCGAGCTGGACTCAGTgctgcgaatgcattgggaaa |
| 13      | CCTCCTAAGTTTCGAGCTGGACTCAGTtacaagtgtgttttgcgca  |
| 14      | CCTCCTAAGTTTCGAGCTGGACTCAGTttggttttgctttttgtgt  |
| 15      | CCTCCTAAGTTTCGAGCTGGACTCAGTtgtcgtcattgtttttgg   |
| 16      | CCTCCTAAGTTTCGAGCTGGACTCAGTgcacacaatctaattccca  |
| 17      | CCTCCTAAGTTTCGAGCTGGACTCAGTctcgtttcaccgacttgtcg |
| 18      | CCTCCTAAGTTTCGAGCTGGACTCAGTcccatggacattcactcgat |
| 19      | CCTCCTAAGTTTCGAGCTGGACTCAGTatttatgttaagtctcgct  |
| 20      | CCTCCTAAGTTTCGAGCTGGACTCAGTtttttttcgcttttggtgc  |
| 21      | CCTCCTAAGTTTCGAGCTGGACTCAGTatgaacgcttatttcgctc  |
| 22      | CCTCCTAAGTTTCGAGCTGGACTCAGTgctcctctttgttaaatt   |
| 23      | CCTCCTAAGTTTCGAGCTGGACTCAGTctgcagatggttgaaggga  |
| 24      | CCTCCTAAGTTTCGAGCTGGACTCAGTgtatatagagtcgattgtgt |
| 25      | CCTCCTAAGTTTCGAGCTGGACTCAGTaccaaagacaacatagcacc |
| 26      | CCTCCTAAGTTTCGAGCTGGACTCAGTttatcactcatacagctaga |
| 27      | CCTCCTAAGTTTCGAGCTGGACTCAGTtcggtaagctagctttatga |
| 28      | CCTCCTAAGTTTCGAGCTGGACTCAGTctgggcagacgctaata    |
| 29      | CCTCCTAAGTTTCGAGCTGGACTCAGTaagtatacgcaatgtgggcc |
| 30      | CCTCCTAAGTTTCGAGCTGGACTCAGTgcttattttgatgtgttcc  |
| 31      | CCTCCTAAGTTTCGAGCTGGACTCAGTatgcatggtgtacatatggg |
| 32      | CCTCCTAAGTTTCGAGCTGGACTCAGTttggccgtaaagccaaactg |
| 33      | CCTCCTAAGTTTCGAGCTGGACTCAGTggttttttgccttgccaaag |
| 34      | CCTCCTAAGTTTCGAGCTGGACTCAGTaacttactcgtttgtacgcg |

|    |                                                 |
|----|-------------------------------------------------|
| 35 | CCTCCTAAGTTTCGAGCTGGACTCAGTccatgcaaaggtcgtatcta |
| 36 | CCTCCTAAGTTTCGAGCTGGACTCAGTgttcgcagggggtaaaacaa |
| 37 | CCTCCTAAGTTTCGAGCTGGACTCAGTtgtctttccacctcttttg  |
| 38 | CCTCCTAAGTTTCGAGCTGGACTCAGTcaacgtcattgactgctgtt |
| 39 | CCTCCTAAGTTTCGAGCTGGACTCAGTaatcagtgttcatcaggtgc |
| 40 | CCTCCTAAGTTTCGAGCTGGACTCAGTgcctgcaaatgatctttcat |
| 41 | CCTCCTAAGTTTCGAGCTGGACTCAGTagcttgccgttattatcttg |
| 42 | CCTCCTAAGTTTCGAGCTGGACTCAGTgttggtgctatccgaaactt |
| 43 | CCTCCTAAGTTTCGAGCTGGACTCAGTtttcctctaaagttcctagc |
| 44 | CCTCCTAAGTTTCGAGCTGGACTCAGTgttcgacggcttaagagtg  |
| 45 | CCTCCTAAGTTTCGAGCTGGACTCAGTgtttatggtgtttacaagtt |
| 46 | CCTCCTAAGTTTCGAGCTGGACTCAGTatgttatttgcttactttcc |
| 47 | CCTCCTAAGTTTCGAGCTGGACTCAGTataacttattgcacgctatt |
| 48 | CCTCCTAAGTTTCGAGCTGGACTCAGTgctttctattaagctgatca |

542

543 **Table S2.** Probes against *rhomboid* exons (*rhomboid\_e*)

| Probe # | Probe Sequence (5'-> 3')                         |
|---------|--------------------------------------------------|
| 1       | CCTCCTAAGTTTCGAGCTGGACTCAGTtgcacgcaactgactttcg   |
| 2       | CCTCCTAAGTTTCGAGCTGGACTCAGTccgactttctcagttgatg   |
| 3       | CCTCCTAAGTTTCGAGCTGGACTCAGTccacacacacgacaatttga  |
| 4       | CCTCCTAAGTTTCGAGCTGGACTCAGTgatataatattctctgcttgc |
| 5       | CCTCCTAAGTTTCGAGCTGGACTCAGTatccaggagcttgattcag   |
| 6       | CCTCCTAAGTTTCGAGCTGGACTCAGTaacttagtttgctgctcgt   |
| 7       | CCTCCTAAGTTTCGAGCTGGACTCAGTtttttcggctcgacattg    |
| 8       | CCTCCTAAGTTTCGAGCTGGACTCAGTtattcgacgttttcactc    |
| 9       | CCTCCTAAGTTTCGAGCTGGACTCAGTccaatgtctttagtagct    |
| 10      | CCTCCTAAGTTTCGAGCTGGACTCAGTaaatgcgtgggtttcttgta  |
| 11      | CCTCCTAAGTTTCGAGCTGGACTCAGTgcctgtcgcaatgtttataa  |
| 12      | CCTCCTAAGTTTCGAGCTGGACTCAGTgcgccgttgaagaaattctt  |
| 13      | CCTCCTAAGTTTCGAGCTGGACTCAGTtctgcgttaagttctccatg  |
| 14      | CCTCCTAAGTTTCGAGCTGGACTCAGTaaatccaccttggtttcggt  |
| 15      | CCTCCTAAGTTTCGAGCTGGACTCAGTatgtcaatgatggttctcctt |
| 16      | CCTCCTAAGTTTCGAGCTGGACTCAGTagttggaggaactggagcac  |
| 17      | CCTCCTAAGTTTCGAGCTGGACTCAGTcaatcggtgtcgtacgacga  |
| 18      | CCTCCTAAGTTTCGAGCTGGACTCAGTtccggttgcgtagatgtg    |
| 19      | CCTCCTAAGTTTCGAGCTGGACTCAGTtacttcagcaggccgatatc  |
| 20      | CCTCCTAAGTTTCGAGCTGGACTCAGTatcactaggatgaaccaggg  |
| 21      | CCTCCTAAGTTTCGAGCTGGACTCAGTggcgaagatggcaatctcaa  |

|    |                                                  |
|----|--------------------------------------------------|
| 22 | CCTCCTAAGTTTCGAGCTGGACTCAGTgaaattctgggcgggcattg  |
| 23 | CCTCCTAAGTTTCGAGCTGGACTCAGTacggaatcggaacgggtagc  |
| 24 | CCTCCTAAGTTTCGAGCTGGACTCAGTcgatagaccagcaccgaatc  |
| 25 | CCTCCTAAGTTTCGAGCTGGACTCAGTctaaagaagcgccacacctg  |
| 26 | CCTCCTAAGTTTCGAGCTGGACTCAGTagtggcgtgcaggaacatg   |
| 27 | CCTCCTAAGTTTCGAGCTGGACTCAGTgatgacgatattgaagccca  |
| 28 | CCTCCTAAGTTTCGAGCTGGACTCAGTctccaggggaatgccaaaaa  |
| 29 | CCTCCTAAGTTTCGAGCTGGACTCAGTcagggatccggcaaaaacgc  |
| 30 | CCTCCTAAGTTTCGAGCTGGACTCAGTaagacctccgagtcgacgac  |
| 31 | CCTCCTAAGTTTCGAGCTGGACTCAGTtgaatgttggccagatgtg   |
| 32 | CCTCCTAAGTTTCGAGCTGGACTCAGTtcttcatgtgcgatagttc   |
| 33 | CCTCCTAAGTTTCGAGCTGGACTCAGTtagatgacaacggatccgagt |
| 34 | CCTCCTAAGTTTCGAGCTGGACTCAGTtagagagcatagcccagatc  |
| 35 | CCTCCTAAGTTTCGAGCTGGACTCAGTcgcttccatcgaagtattgg  |
| 36 | CCTCCTAAGTTTCGAGCTGGACTCAGTaggtgggcaatgtacgacac  |
| 37 | CCTCCTAAGTTTCGAGCTGGACTCAGTcagaaagccgatcgttagtc  |
| 38 | CCTCCTAAGTTTCGAGCTGGACTCAGTggtgaccgaagtctttagc   |
| 39 | CCTCCTAAGTTTCGAGCTGGACTCAGTcagatgagctgctctactc   |
| 40 | CCTCCTAAGTTTCGAGCTGGACTCAGTcgaagacggtgaaggcacag  |
| 41 | CCTCCTAAGTTTCGAGCTGGACTCAGTccgtgttgatcaggttgaaa  |
| 42 | CCTCCTAAGTTTCGAGCTGGACTCAGTgcaacagatgctgggtaatc  |
| 43 | CCTCCTAAGTTTCGAGCTGGACTCAGTcaaacttaggacactcccag  |
| 44 | CCTCCTAAGTTTCGAGCTGGACTCAGTtagcatgctgacgactccgaa |
| 45 | CCTCCTAAGTTTCGAGCTGGACTCAGTaagctcaagcagattccgaa  |
| 46 | CCTCCTAAGTTTCGAGCTGGACTCAGTaactctctgtctctgatct   |
| 47 | CCTCCTAAGTTTCGAGCTGGACTCAGTgagtgaacttttctttcca   |
| 48 | CCTCCTAAGTTTCGAGCTGGACTCAGTgtactatgtttcgaactga   |

544

545 **Table S3.** Probes against *rhomboid* intron (*rhomboid\_i*)

| Probe# | Probe sequence (5'-> 3')                        |
|--------|-------------------------------------------------|
| 1      | CCTCCTAAGTTTCGAGCTGGACTCAGTttgtggctttagcttgtat  |
| 2      | CCTCCTAAGTTTCGAGCTGGACTCAGTgcaatttgacatttcttgc  |
| 3      | CCTCCTAAGTTTCGAGCTGGACTCAGTttttgcccgtgtgacaattt |
| 4      | CCTCCTAAGTTTCGAGCTGGACTCAGTcgctctaaagttgaaatgct |
| 5      | CCTCCTAAGTTTCGAGCTGGACTCAGTgggcacacaggttgaacaaa |
| 6      | CCTCCTAAGTTTCGAGCTGGACTCAGTgagcgagagagatagagcga |
| 7      | CCTCCTAAGTTTCGAGCTGGACTCAGTtttttatgcttctgctgc   |
| 8      | CCTCCTAAGTTTCGAGCTGGACTCAGTaacatagtttcacatggccc |

|    |                                                 |
|----|-------------------------------------------------|
| 9  | CCTCCTAAGTTTCGAGCTGGACTCAGTtaattcattcggccttcttt |
| 10 | CCTCCTAAGTTTCGAGCTGGACTCAGTgcgggctttaagacataatg |
| 11 | CCTCCTAAGTTTCGAGCTGGACTCAGTgcatgaagaagagatgtcga |
| 12 | CCTCCTAAGTTTCGAGCTGGACTCAGTagactgcaccgaatgtccat |
| 13 | CCTCCTAAGTTTCGAGCTGGACTCAGTaggcacgaaatcgcagtcgg |
| 14 | CCTCCTAAGTTTCGAGCTGGACTCAGTcggttgcttagcaatttcaa |
| 15 | CCTCCTAAGTTTCGAGCTGGACTCAGTgctcttttcatgttcttcat |
| 16 | CCTCCTAAGTTTCGAGCTGGACTCAGTgaaaaagtgagtgggtgccg |
| 17 | CCTCCTAAGTTTCGAGCTGGACTCAGTcggttgcttttgtgtctg   |
| 18 | CCTCCTAAGTTTCGAGCTGGACTCAGTtcaagtcgattgcacacac  |
| 19 | CCTCCTAAGTTTCGAGCTGGACTCAGTcactcacactcattgtgttc |
| 20 | CCTCCTAAGTTTCGAGCTGGACTCAGTtaacaaattcattgccttgc |
| 21 | CCTCCTAAGTTTCGAGCTGGACTCAGTctgttcgtcgcaacaaggaa |
| 22 | CCTCCTAAGTTTCGAGCTGGACTCAGTgtcacagcacaatcttctt  |
| 23 | CCTCCTAAGTTTCGAGCTGGACTCAGTtgtaaatcgattcgattca  |
| 24 | CCTCCTAAGTTTCGAGCTGGACTCAGTccagagacatttctcacia  |
| 25 | CCTCCTAAGTTTCGAGCTGGACTCAGTgccaggcattattgtaattc |
| 26 | CCTCCTAAGTTTCGAGCTGGACTCAGTatggccaactaatcagctaa |
| 27 | CCTCCTAAGTTTCGAGCTGGACTCAGTcagccctgaaatcatcttcg |
| 28 | CCTCCTAAGTTTCGAGCTGGACTCAGTtagcttgtgtagcatctacg |
| 29 | CCTCCTAAGTTTCGAGCTGGACTCAGTcccgaaattagctggacaaa |
| 30 | CCTCCTAAGTTTCGAGCTGGACTCAGTatttgatgggccaagtttgc |
| 31 | CCTCCTAAGTTTCGAGCTGGACTCAGTgtcagcttgtgtgagctaac |
| 32 | CCTCCTAAGTTTCGAGCTGGACTCAGTttttccccgaagggaact   |
| 33 | CCTCCTAAGTTTCGAGCTGGACTCAGTaattttgtttatggcctggg |
| 34 | CCTCCTAAGTTTCGAGCTGGACTCAGTaagcgaaggaaaagcctgct |
| 35 | CCTCCTAAGTTTCGAGCTGGACTCAGTtgtggggaaatgcagcagaa |
| 36 | CCTCCTAAGTTTCGAGCTGGACTCAGTcgagcacaacaaagagca   |
| 37 | CCTCCTAAGTTTCGAGCTGGACTCAGTgagaggagcgataaagtgt  |
| 38 | CCTCCTAAGTTTCGAGCTGGACTCAGTgcgccgttgaagaaattctg |

546

**Table 1**

|                                                                                     | Organism                       | Transcript       | microRNA          | Position on 3'UTR | Site type |
|-------------------------------------------------------------------------------------|--------------------------------|------------------|-------------------|-------------------|-----------|
|     | <i>Drosophila melanogaster</i> | rho-RA/RB        | dme-miR-9a/b/c-5p | 340               | 8mer      |
|                                                                                     |                                |                  |                   | 1075              | 7_A1      |
|     | <i>Tribolium castaneum</i>     | TC034044         | tca-miR-9b-5p     | 416               | 7_m8      |
|                                                                                     |                                |                  | tca-miR-9a/e/c-5p | 188               | 8mer      |
|                                                                                     |                                |                  |                   | 417               | 8mer      |
|     | <i>Anopheles gambiae</i>       | AGAP005058 RA/RB | aga-miR-9a/b/c    | 405               | 7_A1      |
|                                                                                     |                                |                  |                   | 904               | 8mer      |
|                                                                                     |                                |                  |                   | 3197              | 8mer      |
|     | <i>Heliconius melpomene</i>    | HMEL008701-RA    | hme-miR-9b        | 710               | 8mer      |
|                                                                                     |                                |                  | hme-miR-9a        | 1561              | 8mer      |
|     | <i>Tetranychus urticae</i>     | tetur14g02680.1  | tur-miR-9-5p      | 138               | 7_A1      |
|    | <i>Caenorhabditis elegans</i>  | rho-1            | cel-miR-79-3p     | 54                | 7_m8      |
|   | <i>Danio rerio</i>             | Rhbdl3-203       | dre-miR-9-5p      | 464               | 7_m8      |
|   | <i>Mus musculus</i>            | Rhbdl3-201       | mmu-miR-9-5p      | 1046              | 7_m8      |
|  | <i>Homo sapiens</i>            | RHBDL3-201/203   | hsa-miR-9-3p      | 2988              | 7_A1      |



**Figure 1**

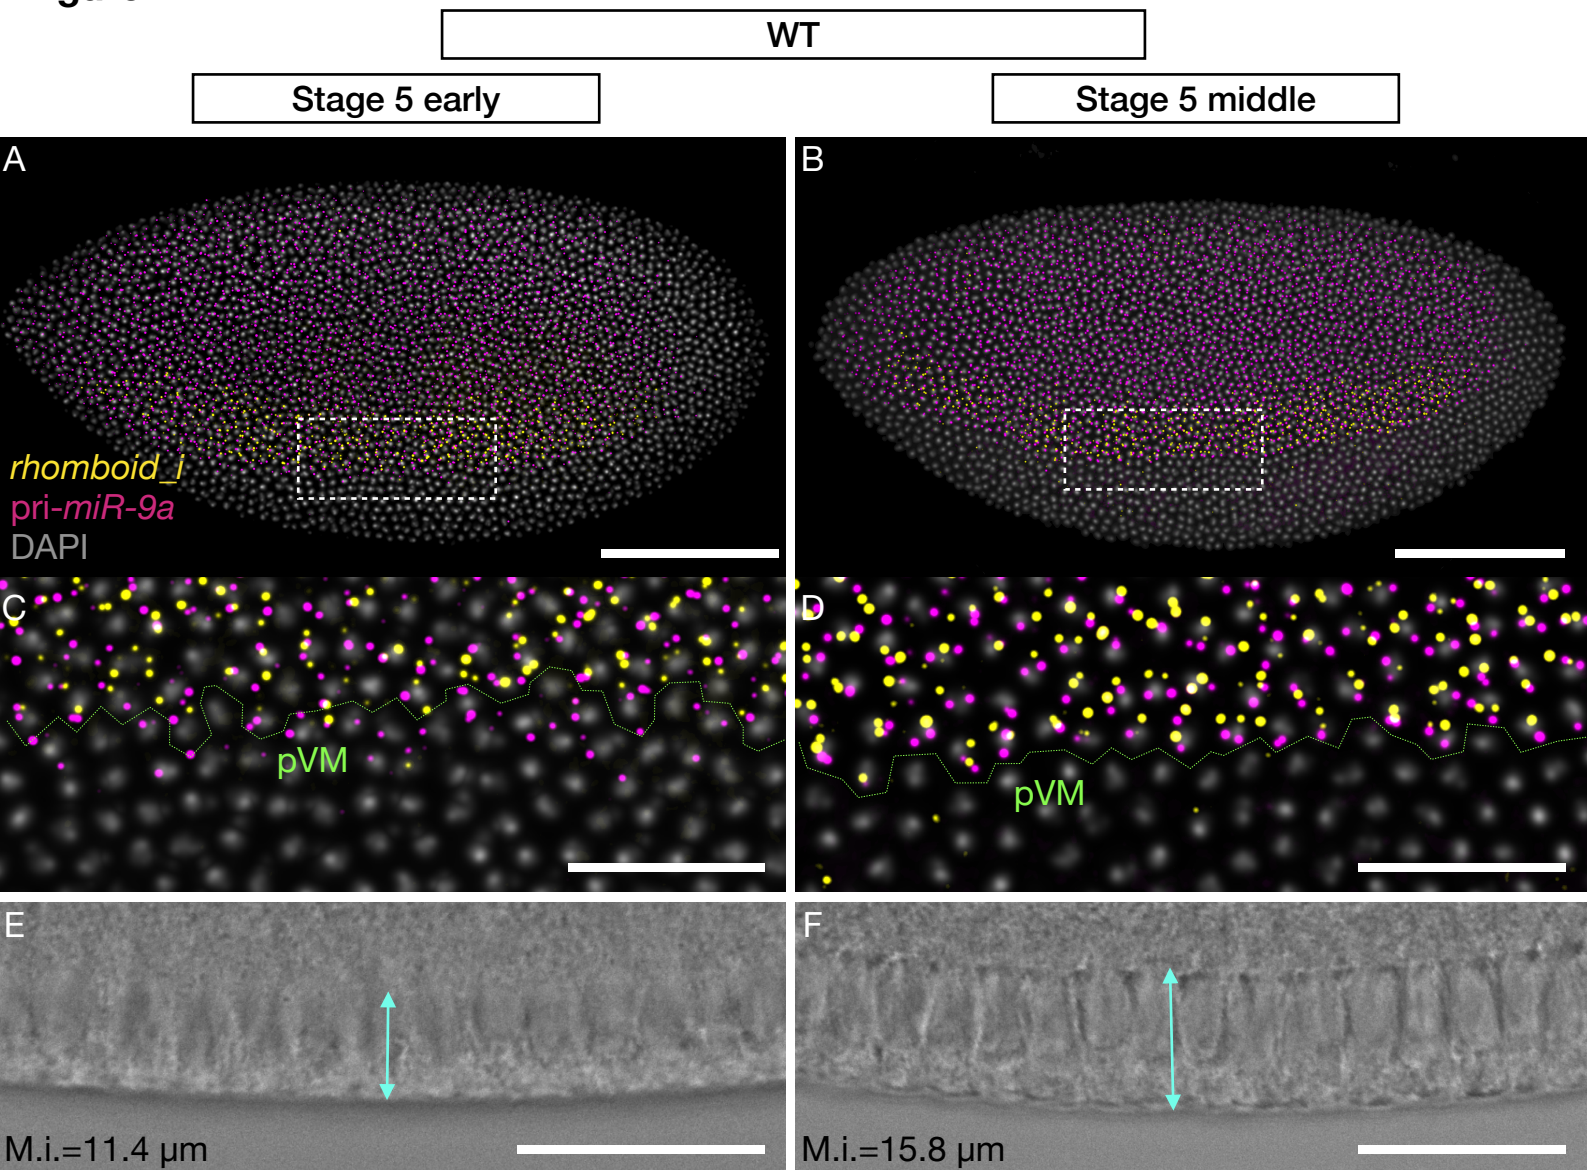

Figure 2

WT

*miR-9a*<sup>E39</sup>

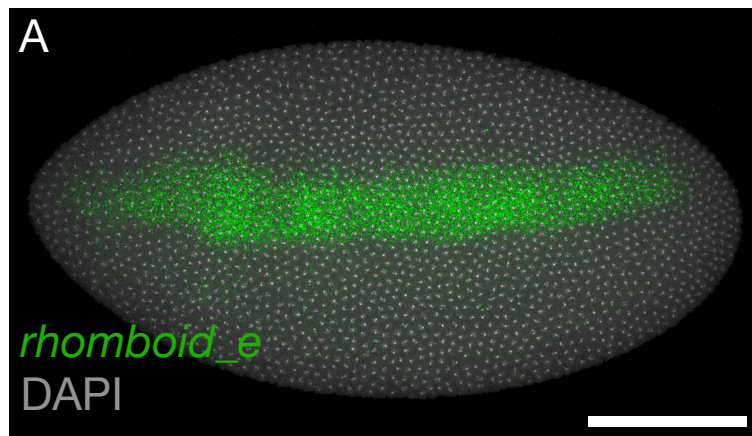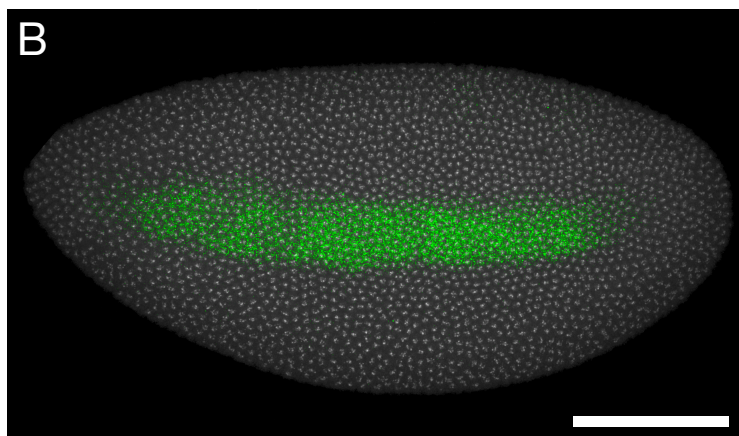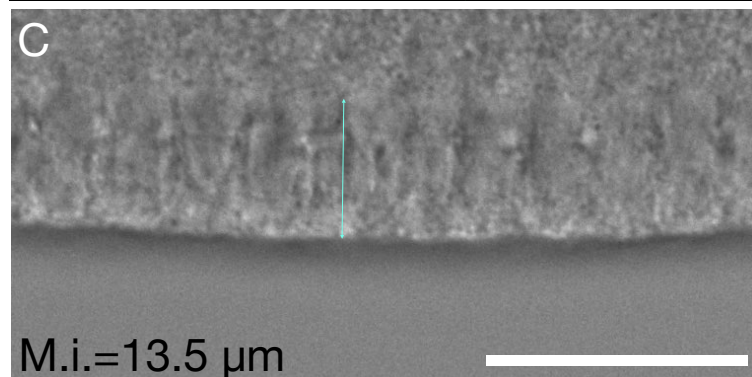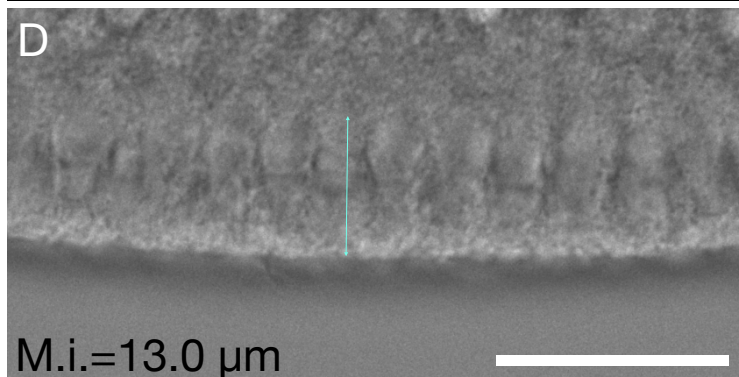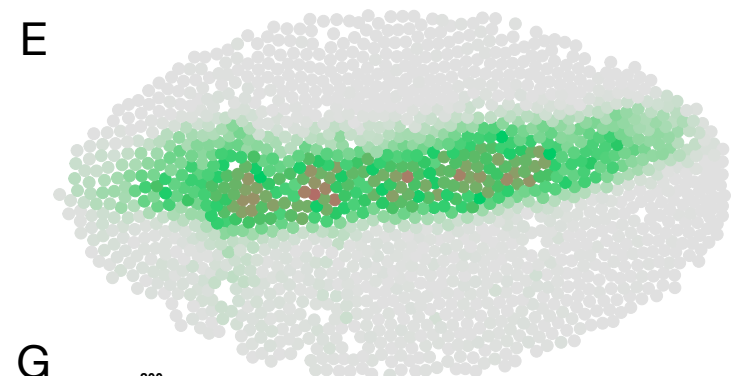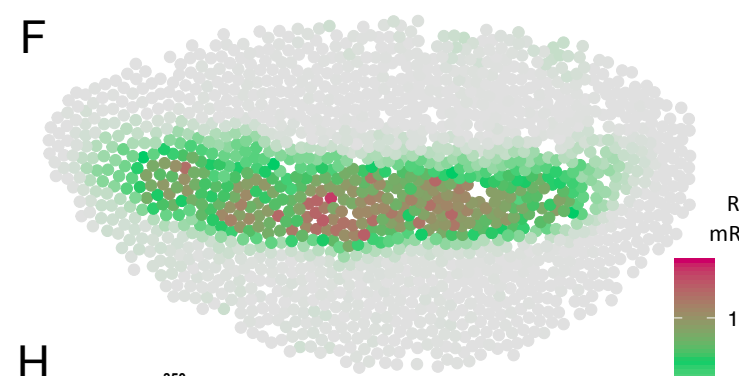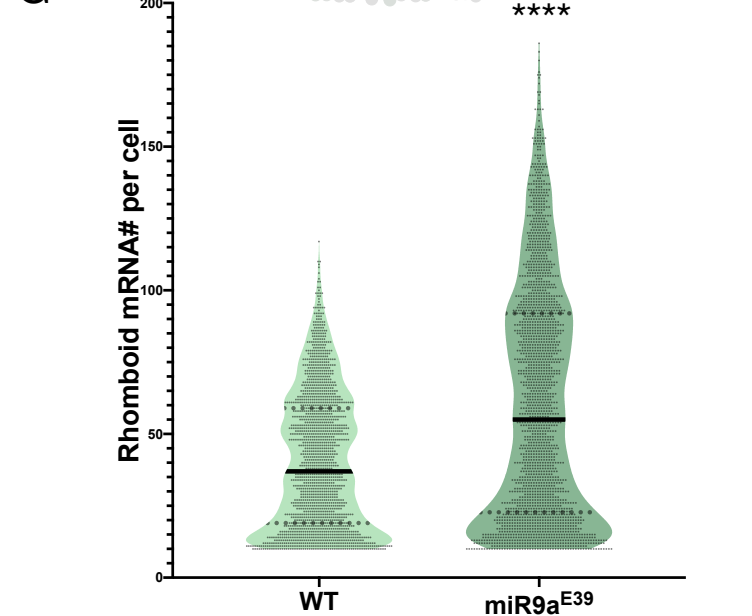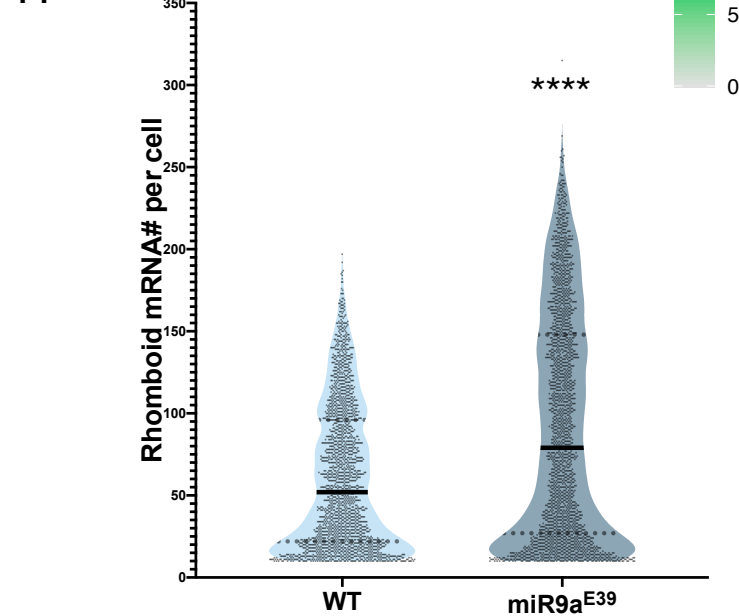

**Figure 3**

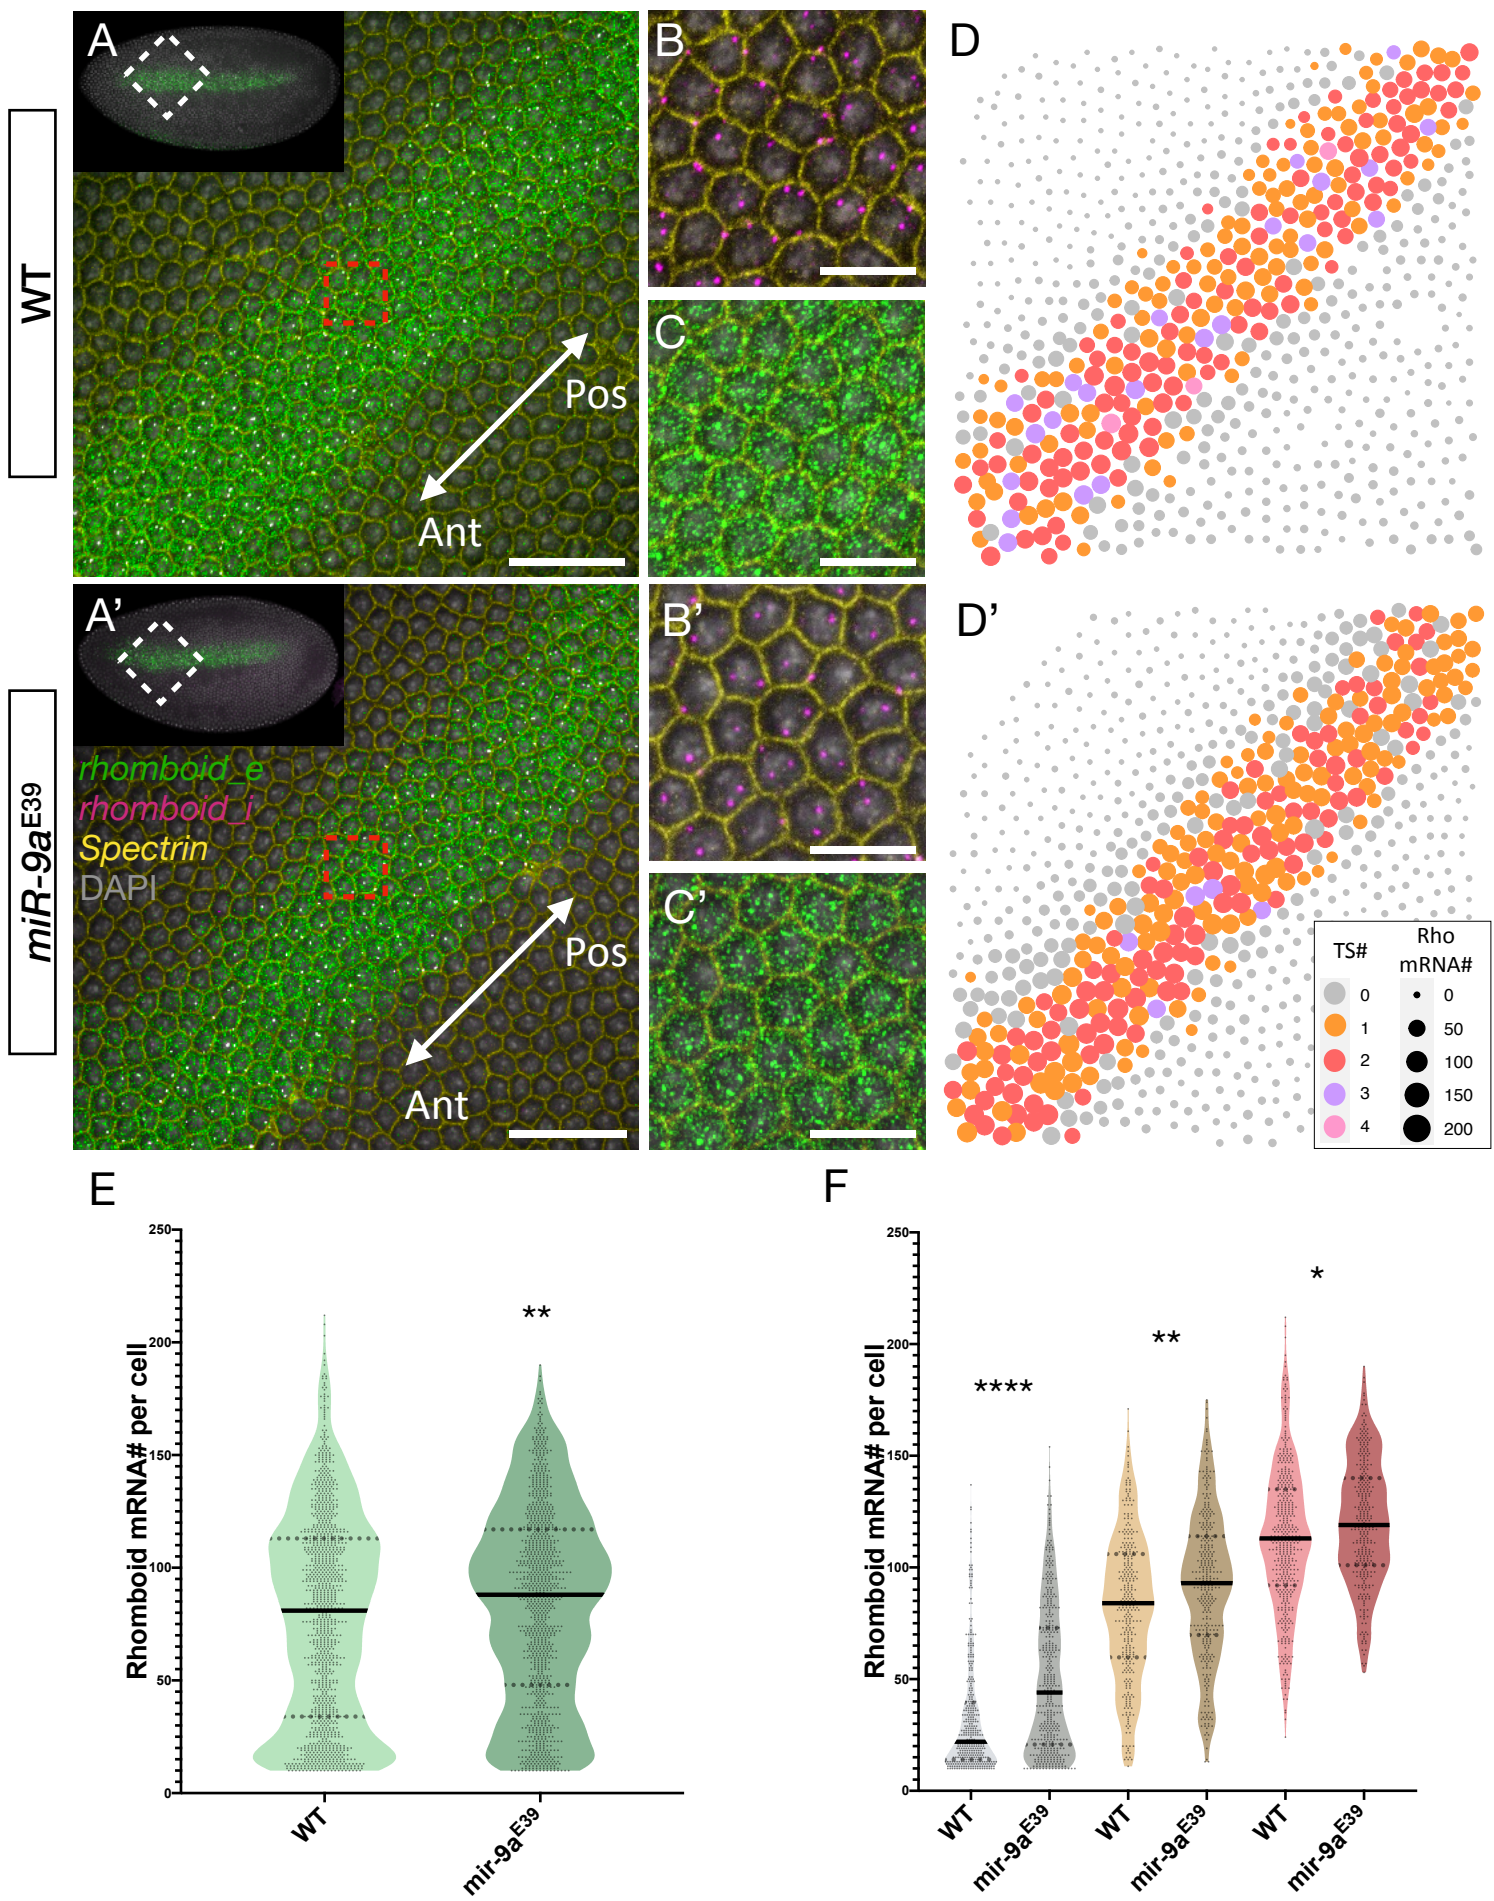

Figure 4

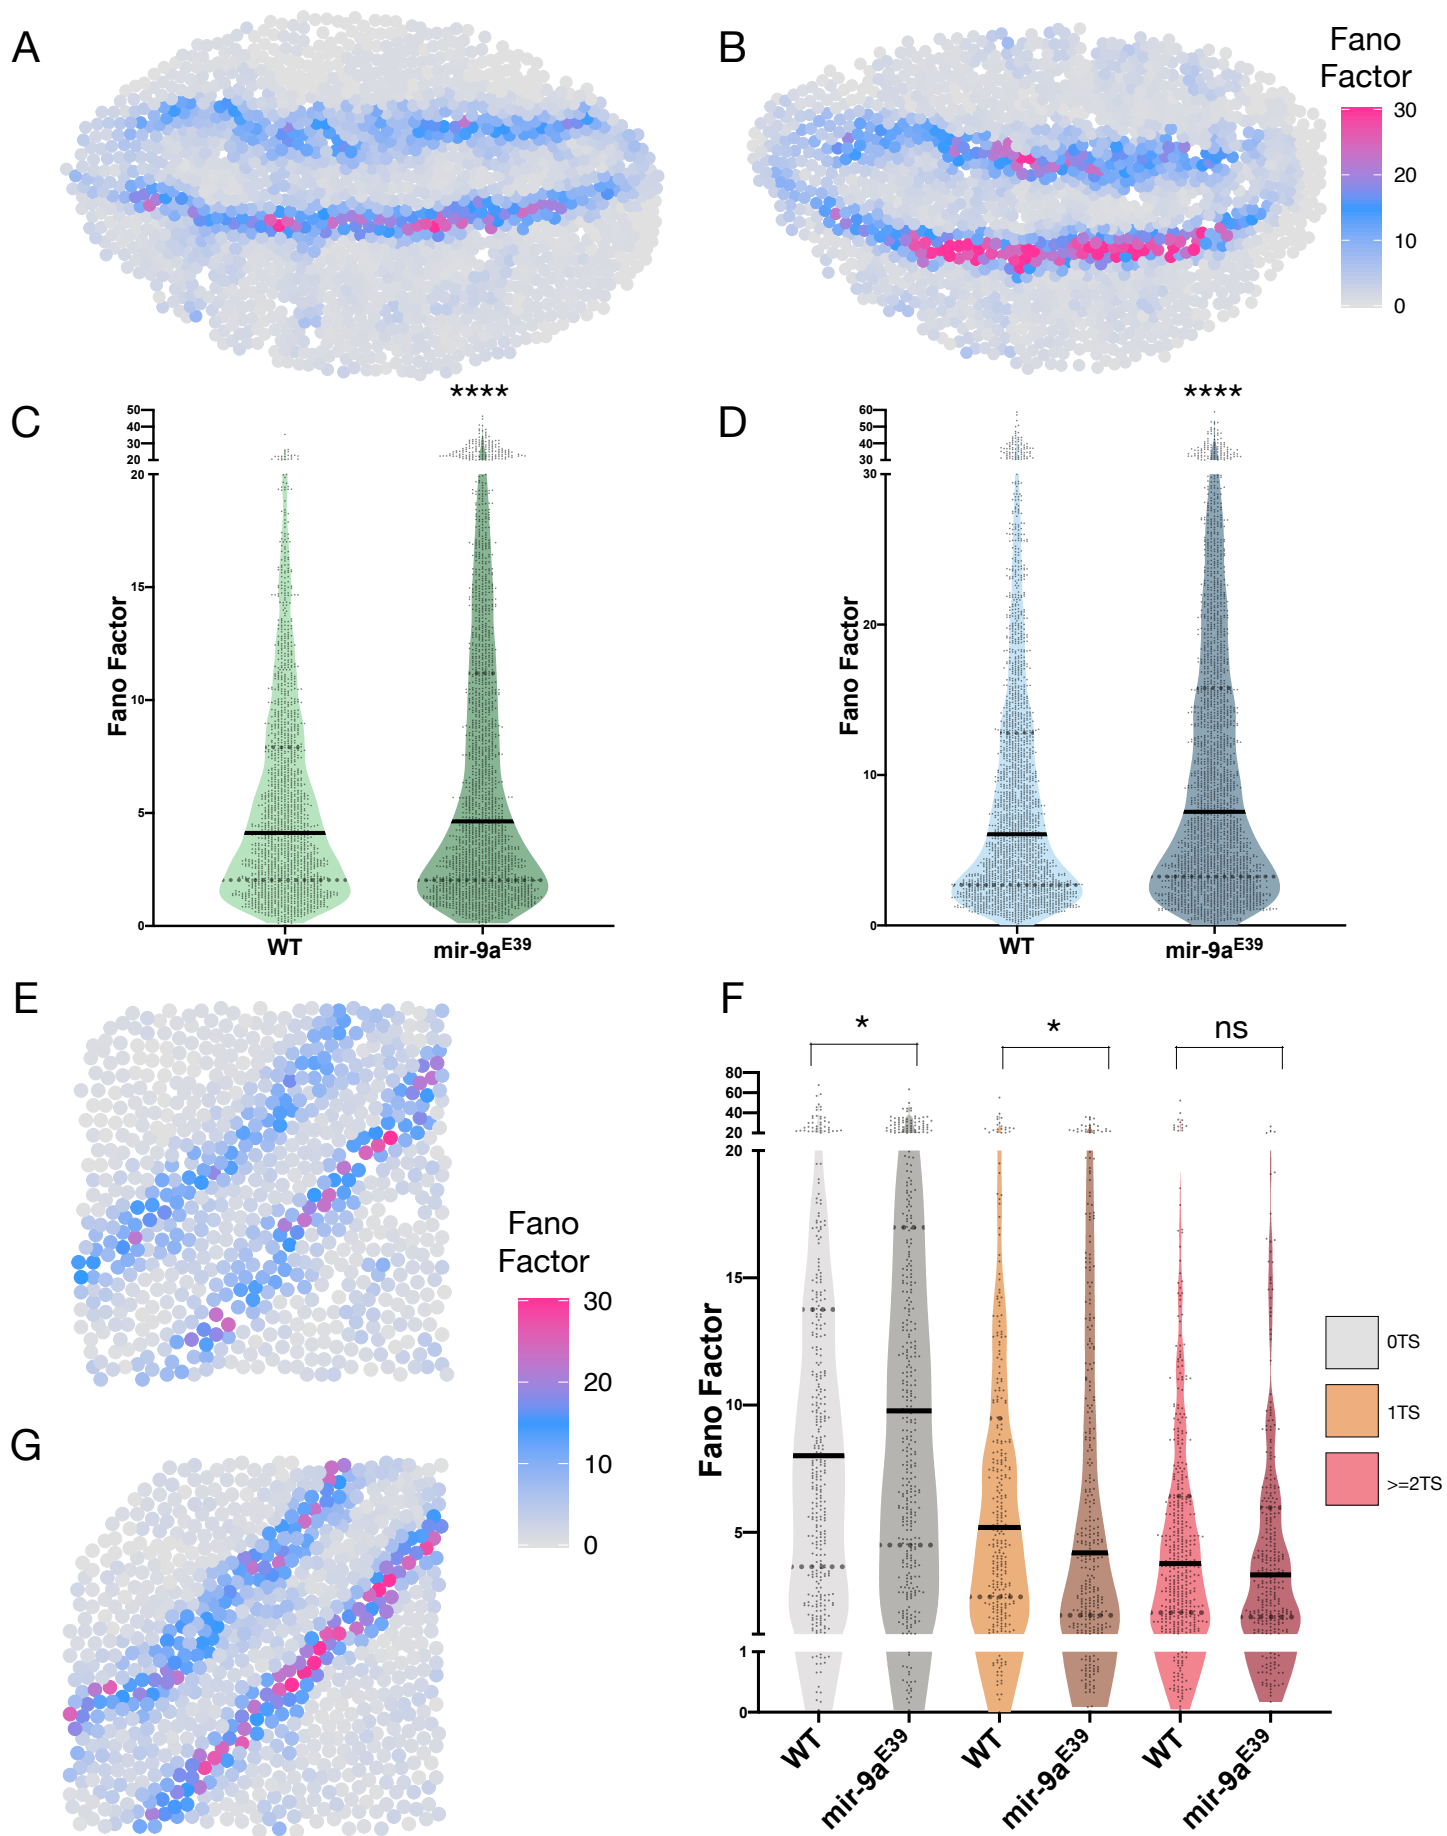

**Figure 5**

Stage 5

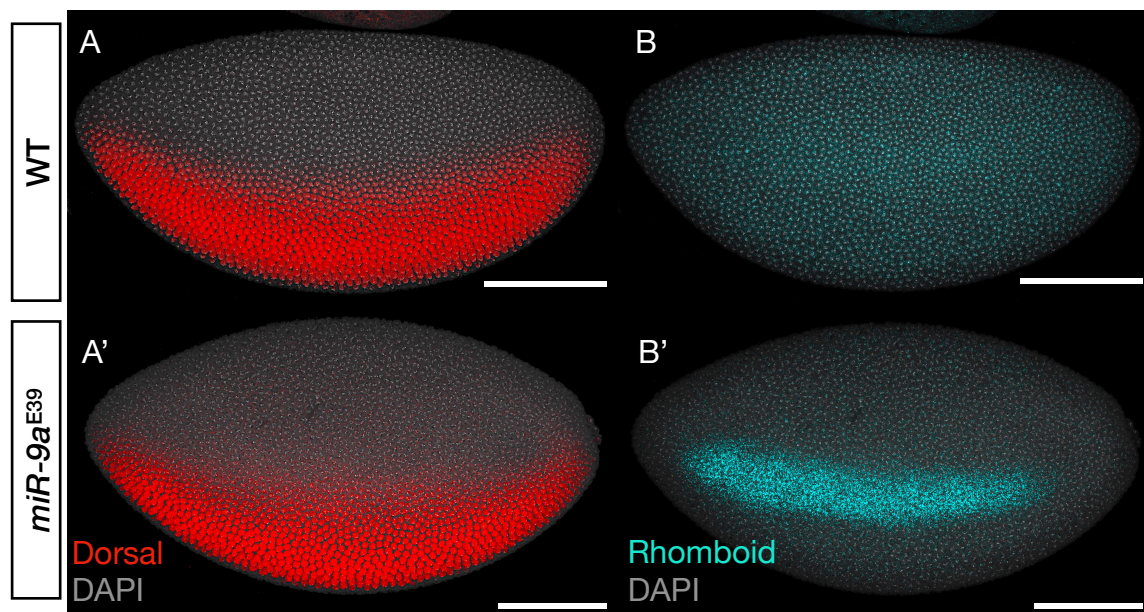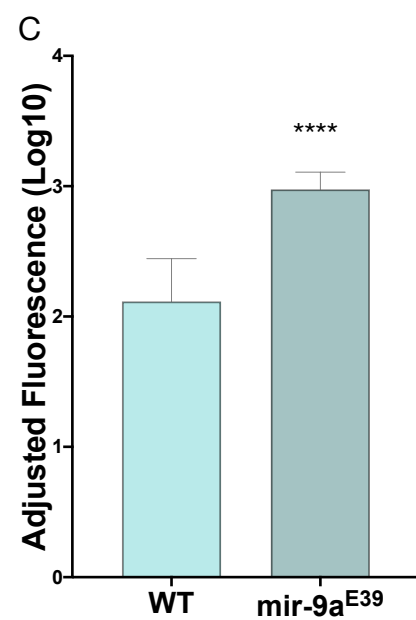

Stage 6

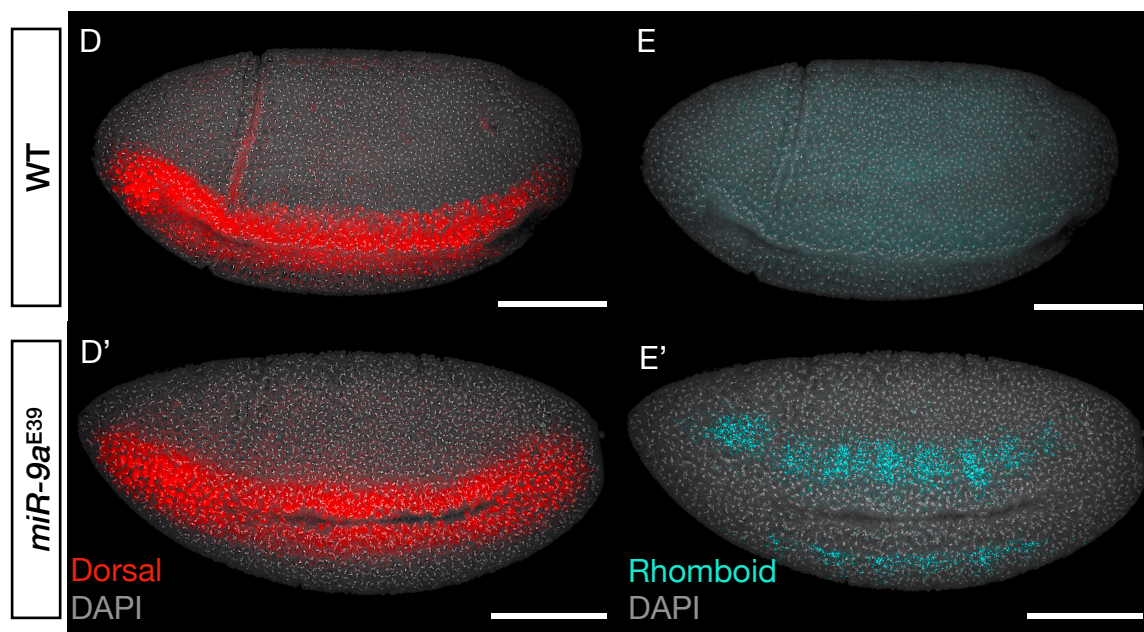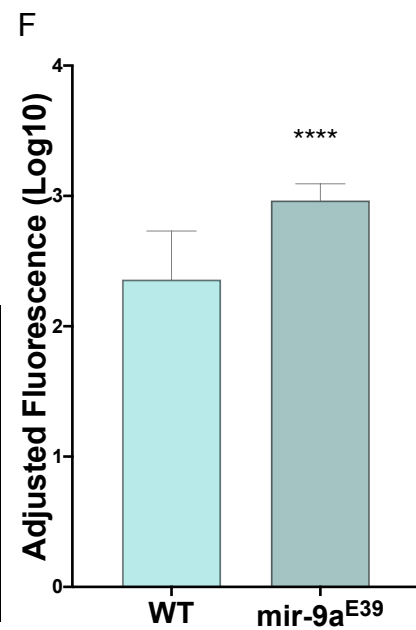

Source: https://www.biorxiv.org/content/10.1101/2021.07.12.452096v1.full.pdf
